# Supplementary material for: Soil Compaction Drives an Intra-Genotype Leaf Economics Spectrum in Wine Grapes
Source: MDPI journal article supplement (doi:10.3390/agriculture12101675), 2022-10-12
Supplement: s1 [file s1]

Archive with 1 entries (1 files):
- agriculture-1943557-supplementary.pdf
