# Supplementary material for: Soil Compaction Drives an Intra-Genotype Leaf Economics Spectrum in Wine Grapes
Source: MDPI journal article supplement (doi:10.3390/agriculture12101675), 2022-10-12
Supplement: s1 [file s1 › agriculture-1943557-supplementary.pdf]

**Supplemental Information for:**

**Full title:** Soil compaction drives an intra-genotype Leaf Economics Spectrum in wine grapes

**Short title:** Leaf trait variation and soil compaction in grape

**Authors and Affiliations:** Adam R. Martin <sup>1\*</sup>, Rachel Mariani <sup>1</sup>, Kimberley A. Cathline <sup>2</sup>, Michael Duncan <sup>2</sup>, Nicholas J. Paroshy <sup>3</sup>, and Gavin Robertson <sup>2</sup>

<sup>1</sup> Department of Physical and Environmental Sciences, University of Toronto  
Scarborough, Canada

<sup>2</sup> Agriculture & Environmental Technologies Innovation Centre, Niagara College, Canada

<sup>3</sup> Department of Integrative Biology, University of Guelph, Canada.

\*Corresponding author: adam.martin@utoronto.ca

**Table S1.** Mean ‘Chardonnay’ leaf trait values and associated standard deviations across 15 plants, growing across five planting rows in 2020, differing in soil bulk density. Each trait-by-row cell reflects the mean and standard deviations on nine leaves. Also shown are the results of an analysis of variance (ANOVA) evaluating differences in traits as a function of planting row. Trait acronyms are defined and presented in Table 1 in the main text.

|                                                                             | Mean trait values ( $\pm$ standard deviations) across planting rows |                   |                   |                       |                   | Analysis of variance |          |
|-----------------------------------------------------------------------------|---------------------------------------------------------------------|-------------------|-------------------|-----------------------|-------------------|----------------------|----------|
| Trait                                                                       | Row 1                                                               | Row 2             | Row 3             | Row 4                 | Row 5             | <i>F</i>             | <i>p</i> |
| $A_{\max}$<br>( $\mu\text{mol CO}_2 \text{ m}^{-2} \text{ s}^{-1}$ )        | 19.87 $\pm$ 3.5                                                     | 12.38 $\pm$ 2.82  | 11.3 $\pm$ 2.13   | 14.0 $\pm$ 5.1        | 9.49 $\pm$ 1.37   | 13.47                | <0.001   |
| $A_{\text{mass}}$<br>( $\mu\text{mol CO}_2 \text{ g}^{-1} \text{ s}^{-1}$ ) | 0.28 $\pm$ 0.05                                                     | 0.15 $\pm$ 0.04   | 0.13 $\pm$ 0.02   | 0.18 $\pm$ 0.06       | 0.1 $\pm$ 0.02    | 24.19                | <0.001   |
| $R_{\text{dark}}$<br>( $\mu\text{mol CO}_2 \text{ m}^{-2} \text{ s}^{-1}$ ) | 0.96 $\pm$ 0.2                                                      | 0.59 $\pm$ 0.15   | 0.67 $\pm$ 0.17   | 0.68 $\pm$ 0.29       | 0.81 $\pm$ 0.24   | 4.239                | 0.006    |
| $R_{\text{mass}}$<br>( $\mu\text{mol CO}_2 \text{ g}^{-1} \text{ s}^{-1}$ ) | 0.013 $\pm$ 0.003                                                   | 0.007 $\pm$ 0.003 | 0.008 $\pm$ 0.003 | 0.009 $\pm$ 0.004     | 0.009 $\pm$ 0.004 | 7.62                 | <0.001   |
| LLCP<br>( $\mu\text{mol PAR m}^{-2} \text{ s}^{-1}$ )                       | 15.33 $\pm$ 4.33                                                    | 13.48 $\pm$ 3.08  | 13.76 $\pm$ 2.68  | 13.73 $\pm$ 4.72      | 17.77 $\pm$ 3.9   | 2.015                | 0.111    |
| $\Phi$<br>( $\text{mol CO}_2 \text{ mol PPFD}^{-1}$ )                       | 0.068 $\pm$ 0.016                                                   | 0.044 $\pm$ 0.017 | 0.049 $\pm$ 0.018 | 0.049 $\pm$ 0.012     | 0.047 $\pm$ 0.013 | 7.72                 | <0.001   |
| Area ( $\text{cm}^2$ )                                                      | 117.02 $\pm$ 19.69                                                  | 79.99 $\pm$ 33.66 | 88.96 $\pm$ 15.63 | 82.76 $\pm$ 14        | 94.12 $\pm$ 9.35  | 4.766                | 0.003    |
| LMA ( $\text{g m}^{-2}$ )                                                   | 72.28 $\pm$ 4.26                                                    | 81.5 $\pm$ 9.85   | 87.92 $\pm$ 4.35  | 76.87 $\pm$ 4.34      | 94.28 $\pm$ 7.86  | 16                   | <0.001   |
| Dry mass (g)                                                                | 0.85 $\pm$ 0.15                                                     | 0.67 $\pm$ 0.34   | 0.79 $\pm$ 0.17   | 0.64 $\pm$ 0.11       | 0.89 $\pm$ 0.15   | 2.712                | 0.043    |
| Carbon (% mass)                                                             | 44.61 $\pm$ 0.6                                                     | 43.13 $\pm$ 0.75  | 43.41 $\pm$ 0.48  | 43.19 $\pm$ 0.39      | 42.89 $\pm$ 0.34  | 14.52                | <0.001   |
| Nitrogen (% mass)                                                           | 2.6 $\pm$ 0.18                                                      | 2.21 $\pm$ 0.19   | 2.07 $\pm$ 0.05   | 2.25 $\pm$ 0.18 $\pm$ | 2.13 $\pm$ 0.1    | 17.07                | <0.001   |

**Table S2.** Variation in 11 ‘Chardonnay’ leaf traits as a function of bulk density (as a fixed factor), while accounting for plant identity (as a random factor). Traits expressing a statistically significant relationship with bulk density (where  $p \leq 0.05$  for the slope parameter) are highlighted in bold. Also shown are marginal  $r^2$  values, which represent the proportion of variation in a given leaf trait explained by fixed factors alone (i.e., bulk density and model intercept), as well as condition  $r^2$  values, which represent the proportion of trait variation explained by fixed and random factors. Sample sizes for all models were 45 leaves, measured in 2020 across 15 individual vines, and log-transformed trait values were used in models according to results presented in Table 1. Trait acronyms and units are presented in Table 1.

|                              | Model Intercept |      |          | Model Slope |      |          | Explained Variance |                   |
|------------------------------|-----------------|------|----------|-------------|------|----------|--------------------|-------------------|
| Trait                        | Estimate        | S.E. | <i>p</i> | Estimate    | S.E. | <i>P</i> | Marginal $r^2$     | Conditional $r^2$ |
| <i>log-A</i> <sub>max</sub>  | 4.6             | 0.7  | <0.001   | -1.3        | 0.4  | 0.008    | 0.311              | 0.674             |
| <i>log-A</i> <sub>mass</sub> | 1.0             | 0.8  | 0.232    | -1.8        | 0.5  | 0.003    | 0.403              | 0.798             |
| <i>R</i> <sub>dark</sub>     | 1.2             | 0.6  | 0.038    | -0.3        | 0.4  | 0.409    | 0.031              | 0.489             |
| <i>log-R</i> <sub>mass</sub> | -3.2            | 0.8  | <0.001   | -1.0        | 0.5  | 0.07     | 0.127              | 0.405             |
| LLCP                         | 7.2             | 9.2  | 0.441    | 4.8         | 5.7  | 0.418    | 0.03               | 0.497             |
| <i>log-Φ</i>                 | -1.8            | 0.4  | <0.001   | -0.8        | 0.3  | 0.009    | 0.243              | 0.424             |
| log-Area                     | 5.4             | 0.5  | <0.001   | -0.5        | 0.3  | 0.097    | 0.093              | 0.278             |
| log-LMA                      | 3.7             | 0.2  | <0.001   | 0.5         | 0.1  | 0.004    | 0.319              | 0.534             |
| Dry mass                     | 0.9             | 0.4  | 0.036    | -0.1        | 0.3  | 0.737    | 0.004              | 0.187             |
| log-Carbon                   | 3.9             | 0.03 | <0.001   | -0.1        | 0.02 | 0.002    | 0.41               | 0.694             |
| log-Nitrogen                 | 1.4             | 0.2  | <0.001   | -0.3        | 0.2  | 0.04     | 0.241              | 0.872             |

**Table S3.** Contributions of leaf traits towards two primary axes in a principal component analysis (PCA) across 45 ‘Chardonnay’ wine grape leaves, measured in 2020 on 15 vines growing across a soil compaction gradient. Correlation coefficients and associated *p*-values are derived from the ‘dimdesc’ function in the ‘FactoMineR’ R package. Only traits significantly contributing to each PCA axis (where  $p < 0.05$ ) are shown. Trait acronyms and units are defined and presented in Table 1 in the main text.

| PCA Axis | Trait             | Correlation | <i>p</i> value |
|----------|-------------------|-------------|----------------|
| Axis 1   | $R_{\text{mass}}$ | 0.888       | <0.001         |
|          | $A_{\text{mass}}$ | 0.831       | <0.001         |
|          | Leaf N            | 0.782       | <0.001         |
|          | $\Phi$            | 0.644       | <0.001         |
|          | Leaf area         | 0.484       | <0.001         |
|          | LLCP              | 0.36        | <0.001         |
|          | LMA               | -0.615      | <0.001         |
| Axis 2   | LLCP              | 0.767       | <0.001         |
|          | LMA               | 0.69        | <0.001         |
|          | Leaf area         | 0.431       | <0.001         |
|          | $R_{\text{mass}}$ | 0.341       | <0.001         |

**Table S4.** Results of a permutational multivariate analysis of variance (PerMANOVA) evaluating variation in seven Leaf Economics traits measured in 2020 across 45 leaves from 15 ‘Chardonnay’ vines, growing across a soil compaction gradient. The Principle Component Analysis related to this PerMANOVA is presented visually in Figure 2 in the main text, and its significant factor loadings are presented in Table S2.

| <b>Factor</b> | <b>D.F.</b> | <b>Sums Of Sqs.</b> | <b>Mean Sqs.</b> | <b><i>F</i> value</b> | <b><i>r</i><sup>2</sup></b> | <b><i>p</i> value</b> |
|---------------|-------------|---------------------|------------------|-----------------------|-----------------------------|-----------------------|
| Row           | 4           | 0.138               | 0.035            | 6.62                  | 0.396                       | 0.0002                |
| Plant         | 2           | 0.005               | 0.002            | 0.44                  | 0.013                       | 0.788                 |
| Row*Plant     | 8           | 0.05                | 0.006            | 1.2                   | 0.143                       | 0.301                 |
| Residuals     | 30          | 0.157               | 0.005            |                       | 0.448                       |                       |
| Total         | 44          | 0.349               |                  |                       | 1                           |                       |

**Table S5.** Correlations among 11 leaf functional traits measured in 2020 on 45 ‘Chardonnay’ leaves from 15 individual vines growing across a soil bulk density gradient, in Niagara-on-the-Lake, Ontario, Canada. Numbers in the upper-right portion of the matrix refer to Pearson correlation coefficients ( $r$ ), and numbers in the bottom-left portion of the matrix are associated  $p$ -values. Bold values denote statistically significant relationships. Trait acronyms and units are defined and presented in Table 1 in the main text.

|                   | $A_{\max}$       | $A_{\text{mass}}$ | $R_{\text{dark}}$ | $R_{\text{mass}}$ | LLCP         | $\Phi$           | Leaf area        | LMA              | Dry mass     | Leaf C        | Leaf N        |
|-------------------|------------------|-------------------|-------------------|-------------------|--------------|------------------|------------------|------------------|--------------|---------------|---------------|
| $A_{\max}$        | -                | <b>0.963</b>      | <b>0.364</b>      | <b>0.444</b>      | 0.015        | <b>0.52</b>      | <b>0.372</b>     | <b>-0.408</b>    | 0.134        | <b>0.551</b>  | <b>0.401</b>  |
| $A_{\text{mass}}$ | <b>&lt;0.001</b> | -                 | <b>0.324</b>      | <b>0.466</b>      | -0.035       | <b>0.503</b>     | 0.27             | <b>-0.638</b>    | -0.041       | <b>0.618</b>  | <b>0.528</b>  |
| $R_{\text{dark}}$ | <b>0.014</b>     | <b>0.03</b>       | -                 | <b>0.936</b>      | <b>0.816</b> | <b>0.628</b>     | <b>0.416</b>     | -0.058           | <b>0.319</b> | 0.268         | <b>0.355</b>  |
| $R_{\text{mass}}$ | <b>0.002</b>     | <b>0.001</b>      | <b>&lt;0.001</b>  | -                 | <b>0.731</b> | <b>0.644</b>     | <b>0.333</b>     | <b>-0.31</b>     | 0.149        | <b>0.395</b>  | <b>0.451</b>  |
| LLCP              | 0.921            | 0.82              | <b>&lt;0.001</b>  | <b>&lt;0.001</b>  | -            | 0.089            | 0.212            | 0.162            | 0.244        | -0.086        | 0.181         |
| $\Phi$            | <b>&lt;0.001</b> | <b>&lt;0.001</b>  | <b>&lt;0.001</b>  | <b>&lt;0.001</b>  | 0.562        | -                | <b>0.418</b>     | -0.219           | 0.246        | <b>0.54</b>   | 0.269         |
| Leaf area         | <b>0.012</b>     | 0.073             | <b>0.005</b>      | <b>0.026</b>      | 0.163        | <b>0.004</b>     | -                | 0.148            | <b>0.897</b> | <b>0.368</b>  | 0.164         |
| LMA               | <b>0.005</b>     | <b>&lt;0.001</b>  | 0.706             | <b>0.038</b>      | 0.287        | 0.148            | 0.332            | -                | <b>0.521</b> | <b>-0.522</b> | <b>-0.645</b> |
| Dry mass          | 0.381            | 0.792             | <b>0.033</b>      | 0.329             | 0.106        | 0.103            | <b>&lt;0.001</b> | <b>&lt;0.001</b> | -            | 0.101         | -0.141        |
| Leaf C            | <b>&lt;0.001</b> | <b>&lt;0.001</b>  | 0.075             | <b>0.007</b>      | 0.576        | <b>&lt;0.001</b> | <b>0.013</b>     | <b>&lt;0.001</b> | 0.51         | -             | <b>0.425</b>  |
| Leaf N            | <b>0.006</b>     | <b>&lt;0.001</b>  | <b>0.017</b>      | <b>0.002</b>      | 0.235        | 0.074            | 0.282            | <b>&lt;0.001</b> | 0.356        | <b>0.004</b>  | -             |

**Table S6.** Contributions of leaf traits, including leaf C concentrations, towards two primary axes in a principal component analyses (PCA) across 45 ‘Chardonnay’ leaves measured in 2020 on 15 vines growing across a soil compaction gradient. Correlation coefficients and associated *p*-values are derived from the ‘dimdesc’ function in the ‘FactoMineR’ R package. Only traits significantly contributing to each PCA axis (where *p*<0.05) are shown. Trait acronyms and units are defined and presented in Table 1 in the main text.

| PCA Axis | Trait             | Correlation | <i>p</i> value |
|----------|-------------------|-------------|----------------|
| Axis 1   | $A_{\text{mass}}$ | 0.855       | <0.001         |
|          | $R_{\text{mass}}$ | 0.832       | <0.001         |
|          | Leaf C            | 0.769       | <0.001         |
|          | Leaf N            | 0.757       | <0.001         |
|          | $\Phi$            | 0.661       | <0.001         |
|          | Leaf area         | 0.494       | <0.001         |
|          | LMA               | -0.647      | <0.001         |
| Axis 2   | LLCP              | 0.859       | <0.001         |
|          | LMA               | 0.584       | <0.001         |
|          | $R_{\text{mass}}$ | 0.453       | <0.001         |
|          | Leaf area         | 0.389       | <0.001         |

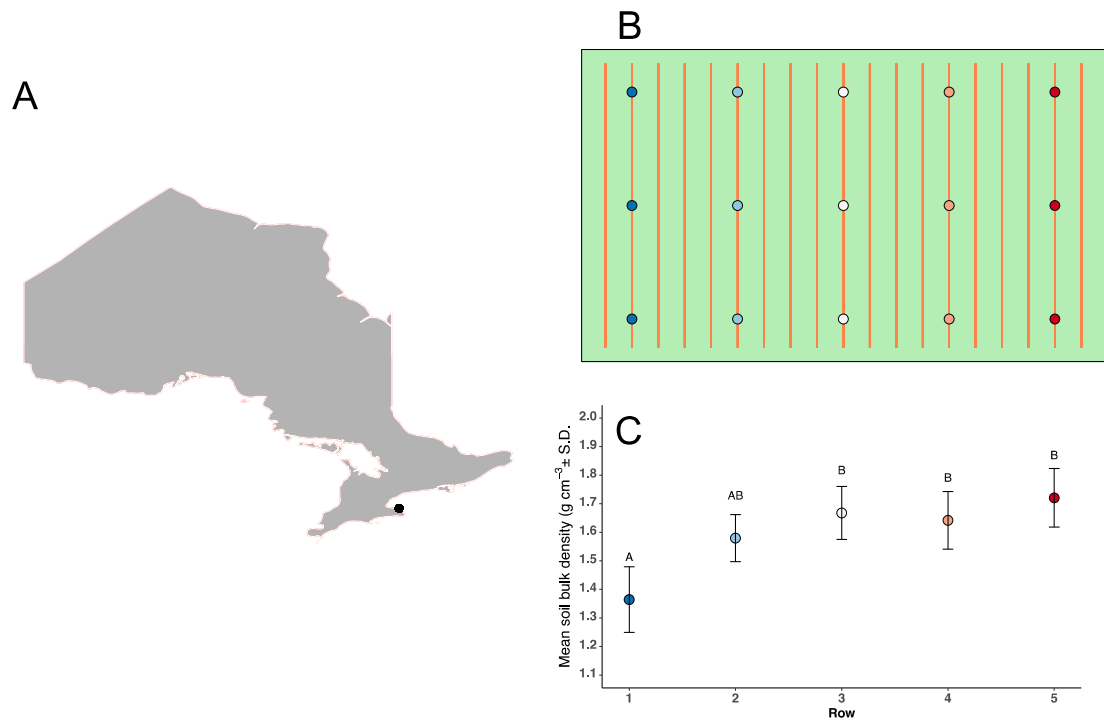

**Figure S1.** Location of the Niagara College Teaching Vineyard in Niagara-on-the-Lake, Ontario, Canada (Panel A), alongside the 2020 study design (Panel B) and soil bulk density values at sampling row locations (Panel C). Points in the upper-right green panel correspond to locations of study ‘Chardonnay’ vines ( $n=15$  total), where spacing among sampled plants was 13-15 m, and point colors correspond to different sampling rows. Rows were distributed across a soil bulk density gradient, shown in the bottom-right panel where points correspond to mean ( $\pm$ S.D.) soil bulk density. Different letters above these points denote statistically significant differences (Tukey HSD  $p \leq 0.05$ ) in mean bulk density. Note that in Panel B above, our study actually entailed 10 interceding planting rows, though only three are shown in the schematic to improve readability.

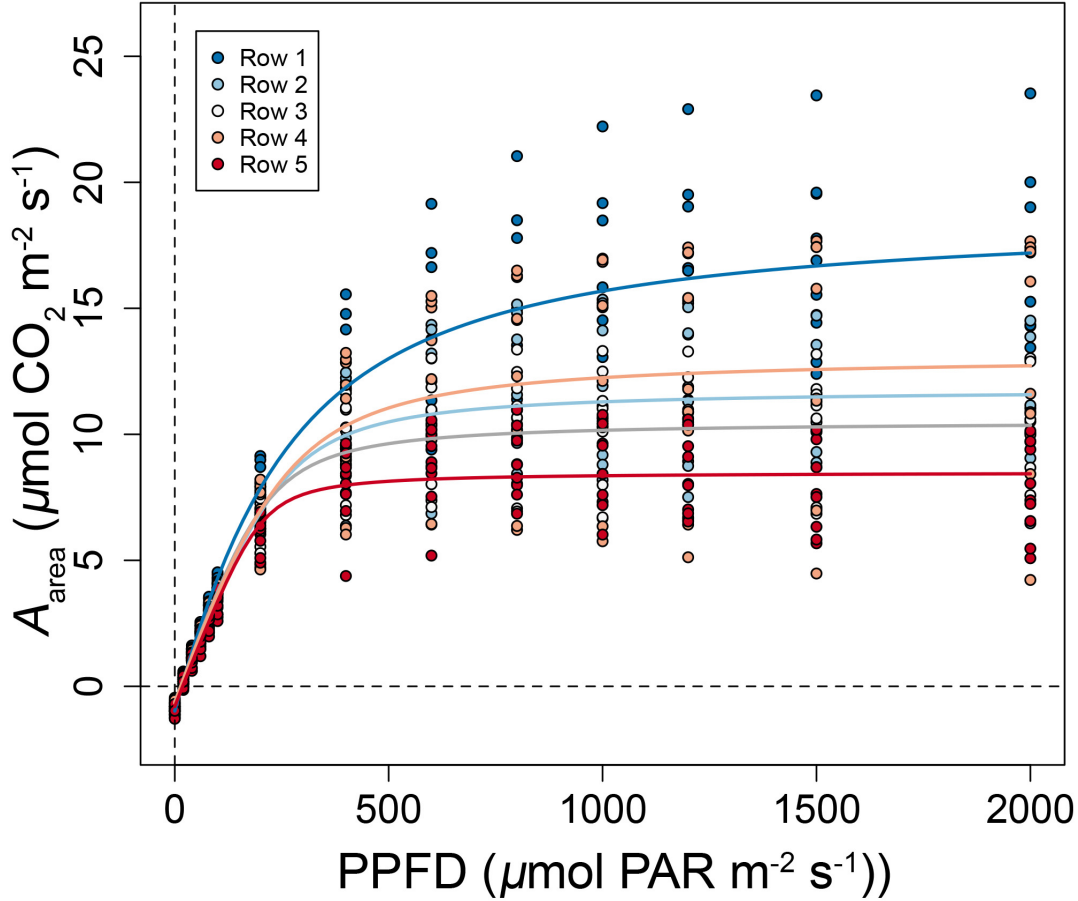

**Figure S2.** Leaf level photosynthesis rates as a function of photosynthetically active photon flux density across 45 ‘Chardonnay’ leaves measured in 2020 on 15 individual vines, growing across five sampling rows (denoted by different colors), which correspond to a bulk density gradient. Shown here for visualization purposes only, are individual light response curves fitted for all data points within a given row (where  $n=126$  individual observations per row, corresponding to the following: 14 data points per leaf \* 3 leaves per plant \* 3 plants per sampling row). For our analysis presented throughout the main text, light response curves were fitted and parameters extracted for each leaf individually; these individual curves are not presented here to aid in visualization of differences in leaf physiological characteristics across the bulk density gradient (see Figure 1 in the main text).
